# Supplementary figures and images for: Obesity alters the ovarian proteomic response to zearalenone exposure
Source: PubMed Central journal article supplement — Biol Reprod. 2021 Apr 14;105(1):278–89. doi: 10.1093/biolre/ioab069 (PMC8256104; doi:10.1093/biolre/ioab069), 2021-04-14

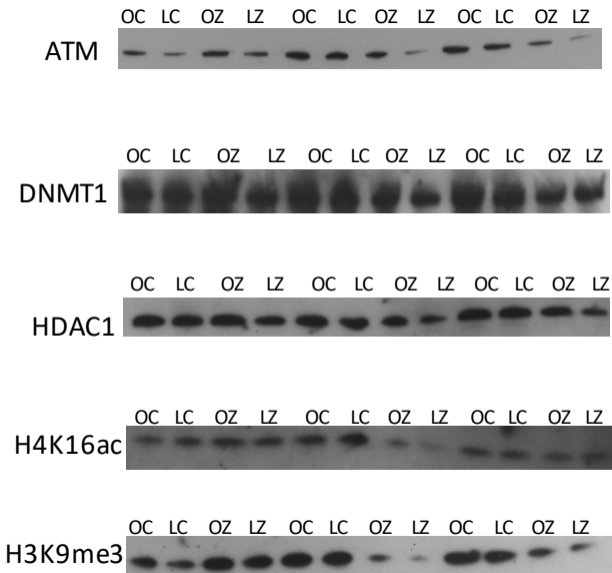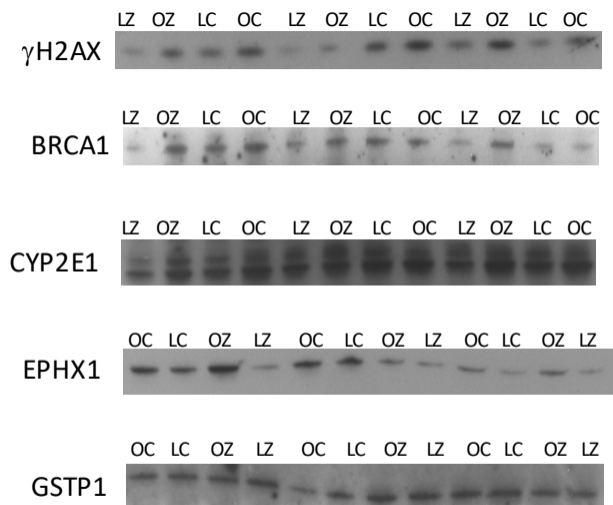

Supplement: supplemental_figure_1_ioab069.pdf [file supplemental_figure_1_ioab069.pdf]
